# Supplementary material for: Use of a highly sensitive recombinant hepatoma cell method to determine dioxin concentrations in samples of fish and crab from a hotspot area
Source: Royal Society of Chemistry journal article supplement (doi:10.1039/c3em30935e), 2013-01-01
Supplement: c3em30935e.pdf [file c3em30935e.pdf]

## Supplementary material for

# Use of a highly sensitive recombinant hepatoma cell method to determine dioxin concentrations in samples of fish and crab from a hotspot area

Ding-Yan Lin,<sup>a</sup> Cherng-Gueih Shy,<sup>bc</sup> Fu-An Chen,<sup>c</sup> Ya-Fan Wang,<sup>d</sup> Kuan-Chung Chen,<sup>a</sup> Lien-Te Hsieh,<sup>a</sup> Feng-Yuan Tsai,<sup>e</sup> Tsui-Chun Tsou<sup>e</sup> and How-Ran Chao<sup>\*a</sup>

<sup>a</sup> *Emerging Compounds Research Center, Department of Environmental Science and Engineering, National Pingtung University of Science and Technology, No. 1, Hseuh Fu Road, Neipu, Pingtung County 912, Taiwan. Fax: +886 8 774 0256; Tel: +886 8 770 3202#7517; E-mail: hrchao@mail.npust.edu.tw*

<sup>b</sup> *Department of Radiology, Pingtung Christian Hospital, No. 60, Da Lian Road, Pingtung City, Pingtung County 900, Taiwan.*

<sup>c</sup> *Department of Pharmacy and Graduate Institute of Pharmaceutical Technology, Tajen University, No. 20, Weisin Road, Sin-er Village, Yanpu Township, Pingtung County 907, Taiwan.*

<sup>d</sup> *Department of Bioenvironmental Engineering, Chung Yuan Christian University, No. 200, Chung Pei Road, Chung Li City, Taoyuan County 320, Taiwan.*

<sup>e</sup> *Division of Environmental Health and Occupational Medicine, National Health Research Institutes, No. 35, Keyan Road, Zhunan Township, Miaoli County 350, Taiwan.*

---

<sup>\*</sup>Corresponding author. Tel.: +886-8-7703202#7517; fax: +886-8-7740256.

E-mail: hrchao@mail.npust.edu.tw (How-Ran Chao)

## **1. Dose–response curve for induction of luciferase activity by TCDD**

### **Fig. 1 Dose–response curve for induction of luciferase activity by TCDD. H-4-II-E**

cells were seeded on 96-well plates at a density of  $10^4$  cells/well and cultured overnight. The cells were infected with AdEasy-4XDRE-TATA-Luc virus for 16 h and then incubated with TCDD at the indicated concentrations for 24 h.

## **2. Dioxin levels in fish and crab samples by HRGC/HRMS (pg-TEQ/g w.w.)**

### **Table 1** Dioxin levels in fish and crab samples obtained in southwestern Taiwan as

determined by the Ad-DR bioassay (pg-BEQ/g w.w.) and HRGC/HRMS (pg-TEQ/g w.w.)

# 1. Dose–response curve for induction of luciferase activity by TCDD

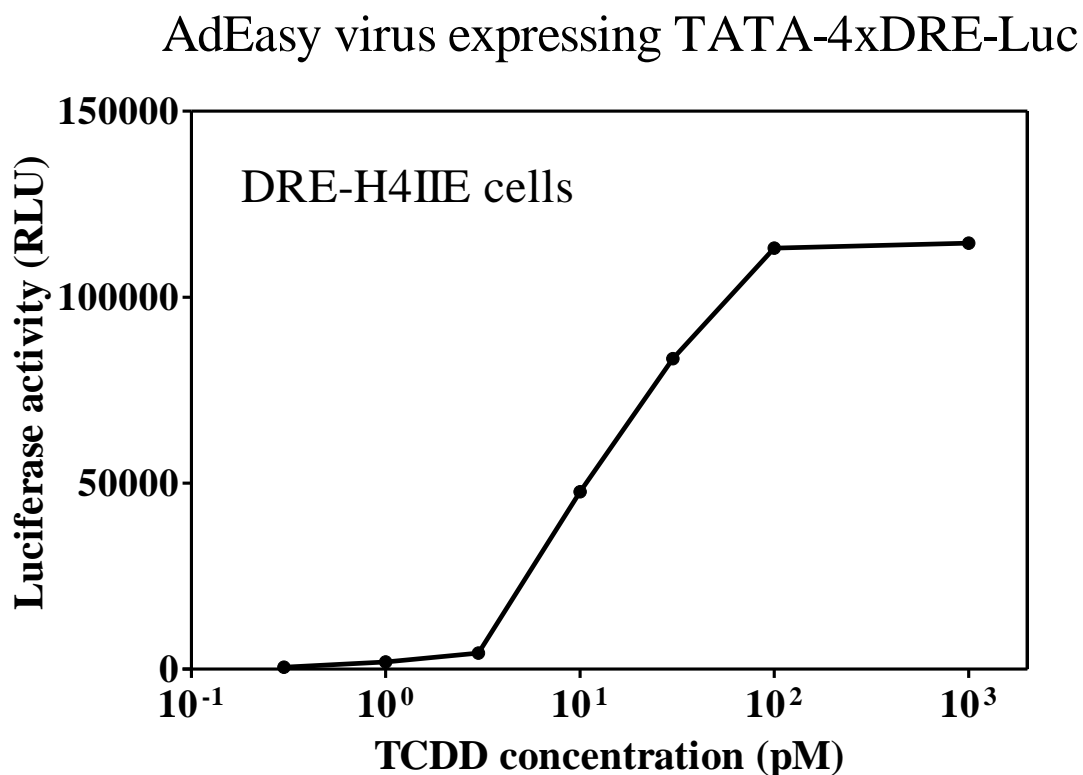

**Fig. 1 Dose–response curve for induction of luciferase activity by TCDD.** H-4-II-E

cells were seeded on 96-well plates at a density of  $10^4$  cells/well and cultured overnight.

The cells were infected with AdEasy-4XDRE-TATA-Luc virus for 16 h and then

incubated with TCDD at the indicated concentrations for 24 h.

## 2. Dioxin levels in fish and crab samples by HRGC/HRMS (pg-TEQ/g w.w.)

**Table 1** Dioxin levels in fish and crab samples obtained in southwestern Taiwan as determined by the Ad-DR bioassay (pg-BEQ/g w.w.) and HRGC/HRMS (pg-TEQ/g w.w.)

| Species (Location)                | N | Mean by Ad-DR bioassay<br>(pg-BEQ/g w.w.) | Mean by HRGC/HRMS<br>(pg-TEQ/g w.w.) |
|-----------------------------------|---|-------------------------------------------|--------------------------------------|
| <u>Whole fish</u>                 |   |                                           |                                      |
| Flathead 1 (LR) <sup>a</sup>      | 3 | 11.9                                      | 0.854                                |
| Grey Mullet 1 (LR)                | 3 | 8.25                                      | 0.891                                |
| Grey Mullet 2 (LR)                | 3 | 6.02                                      | 0.280                                |
| Milk Fish 1 (LR)                  | 3 | 18.3                                      | 0.435                                |
| Milk Fish 2 (CR) <sup>b</sup>     | 3 | 3.79                                      | 0.484                                |
| Perth Herring 1 (LR)              | 3 | 17.0                                      | 1.810                                |
| Tarpon 1 (LR)                     | 3 | 18.7                                      | 0.471                                |
| Yellow Fin Sea Bream 1 (LR)       | 3 | 3.65                                      | 0.459                                |
| Perth Herring 2 (AP)              | 3 | 684                                       | 137                                  |
| <u>Fish muscles</u>               |   |                                           |                                      |
| Milk Fish 3 (LR)                  | 3 | 2.80                                      | 0.060                                |
| Perth Herring 3 (LR)              | 3 | 5.08                                      | 0.341                                |
| Perth Herring 4 (AP) <sup>c</sup> | 3 | 769                                       | 104                                  |
| Perth Herring 5 (LR)              | 3 | 15.5                                      | 0.702                                |
| Tarpon 2 (LR)                     | 3 | 2.53                                      | 0.052                                |
| Tilapia 1 (CR)                    | 3 | 2.25                                      | 0.347                                |
| Tilapia 2 (CR)                    | 3 | 1.80                                      | 0.287                                |
| Tilapia 3 (CR)                    | 3 | 1.98                                      | 0.183                                |
| <u>Fish viscera</u>               |   |                                           |                                      |
| Tilapia 4 (LR)                    | 3 | 283                                       | 25.2                                 |
| Tilapia 5 (CR)                    | 3 | 237                                       | 14.6                                 |
| Tilapia 6 (AP)                    | 3 | 855                                       | 156                                  |
| <u>Crab muscles</u>               |   |                                           |                                      |
| Brachyura 1 (LR)                  | 3 | 3.84                                      | 0.104                                |
| Brachyura 2 (AP)                  | 3 | 246                                       | 39.8                                 |
| Mud Crab 1 (CR)                   | 3 | 1.90                                      | 0.234                                |

<sup>a</sup> LR : Luerhmen River, <sup>b</sup> CR : Chufakang River, <sup>c</sup> AP : the pond near an abandoned plant
